# Supplementary material
Source: ML conference proceedings conference paper supplement (https://openaccess.thecvf.com/content/CVPR2026/html/Zeng_ShiftLUT_Spatial_Shift_CVPR_2026_paper.html)
Supplement: Supplementary file 1 [file Zeng_ShiftLUT_Spatial_Shift_CVPR_2026_supplemental.pdf]

# ShiftLUT: Spatial Shift Enhanced Look-Up Tables for Efficient Image Restoration

## Supplementary Material

In this supplementary file, we provide:

- Preliminary knowledge for the training, transferring, and testing process of LUT-based methods, as well as the SMS strategy in Sec. S1.
- An additional ablation study on comparing alternative shifting operations with LSS in Sec. S2.
- An additional ablation study on integrating LSS into other LUT-based methods in Sec. S3.
- More quantitative and qualitative comparisons among LUT methods on image restoration tasks in Sec. S4.
- Pseudo code of EAS in Sec. S5.

### S1. Preliminary

Lookup Table (LUT) based super-resolution aims to replace expensive pixel-wise computations with efficient table lookup and interpolation. The core idea is to train a lightweight SR model with a constrained receptive field (RF). Once the model is fully trained, enumerates all possible input configurations within this RF and stores the corresponding high-resolution (HR) outputs in a precomputed LUT. During inference, the HR value is obtained exclusively by querying and interpolating LUT entries, yielding extremely fast runtime. As illustrated in Fig. 1, the overall process of LUT-based methods involves three primary stages: (1) training a neural network, (2) transferring its learned mapping into LUTs, and (3) performing inference entirely through LUT queries.

**Training.** Let  $x_i \in \mathbb{R}^{k \times k}$  denote the low-resolution (LR) input patch corresponding to a receptive field of size  $k \times k$  pixels. A compact CNN  $f(\cdot)$  constrained to this RF is trained such that it predicts  $r^2$  HR sub-pixels following the pixel-shuffle paradigm:

$$\hat{y}_i = f(x_i), \quad \hat{y}_i \in \mathbb{R}^{r^2}, \quad (1)$$

where  $r$  is the upsampling factor. To enlarge the effective context while keeping RF small, the model is trained using 4 rotational augmentations:

$$\hat{y}_i = \frac{1}{4} \sum_{j=0}^3 R_j^{-1}(f(R_j(x_i))), \quad (2)$$

where  $R_j$  rotates the patch by  $j \times 90^\circ$ . The trained network is only used once to build the LUT, and it is not required during inference.

**Transferring.** After training, enumerates every possible input configuration within the RF space and stores the network output into an  $n$ -dimensional LUT, where  $n = k^2$  is the number of pixels in the receptive field.

Because a full LUT with  $2^8$  bins per dimension is prohibitively large for  $n \geq 3$ , previous studies adopt uniform sampling with interval  $s$  (e.g.,  $s = 16$  or  $24$ ) to address this issue. Each input pixel value  $v \in [0, 255]$  is quantized by:

$$\tilde{v} = \text{clip}\left(\left\lfloor \frac{v}{s} \right\rfloor, 0, N - 1\right), \quad (3)$$

where  $N = \frac{256}{s} + 1$  is the number of sampling bins. For each sampled tuple  $(\tilde{v}_1, \dots, \tilde{v}_n)$  compute:

$$\text{LUT}[\tilde{v}_1, \dots, \tilde{v}_n] = f(v_1, \dots, v_n), \quad (4)$$

where  $(v_1, \dots, v_n)$  is the corresponding representative input. This produces an  $n$ -dimensional array storing  $r^2$  HR sub-pixels per entry.

**Testing.** At test time, the HR reconstruction is performed solely via memory lookup and multidimensional interpolation. Given an LR patch  $(v_1, \dots, v_n)$ , it identifies the nearest sampled bins by extracting the most significant bits:

$$\tilde{v}_i = \left\lfloor \frac{v_i}{s} \right\rfloor, \quad L_i = v_i \bmod s, \quad (5)$$

where  $L_i$  is the residual offset used for interpolation.

For  $n$ -dimensional LUTs, simplex-based interpolation (triangle in 2D, tetrahedron in 3D, 4-simplex in 4D) is adopted. Let  $\{O_0, \dots, O_n\}$  be the LUT vertices of the selected simplex and  $\{w_0, \dots, w_n\}$  the corresponding barycentric weights derived from  $(L_1, \dots, L_n)$ . The final HR output is:

$$\hat{y} = \frac{1}{s} \sum_{i=0}^n w_i O_i. \quad (6)$$

This inference pipeline contains no convolution and only involves table lookup and a few integer operations, enabling extremely fast execution on resource-limited devices.

**Separable Mapping Strategy (SMS).** A major challenge in converting convolutions to LUTs is the exponential growth of storage with kernel size. For example, a  $3 \times 3$  convolution requires a 9-dimensional LUT, which is impractical.

SMS [4] addresses this by decomposing an  $k \times k$  convolution into  $k^2$  independent  $1 \times 1$  mappings, each represented

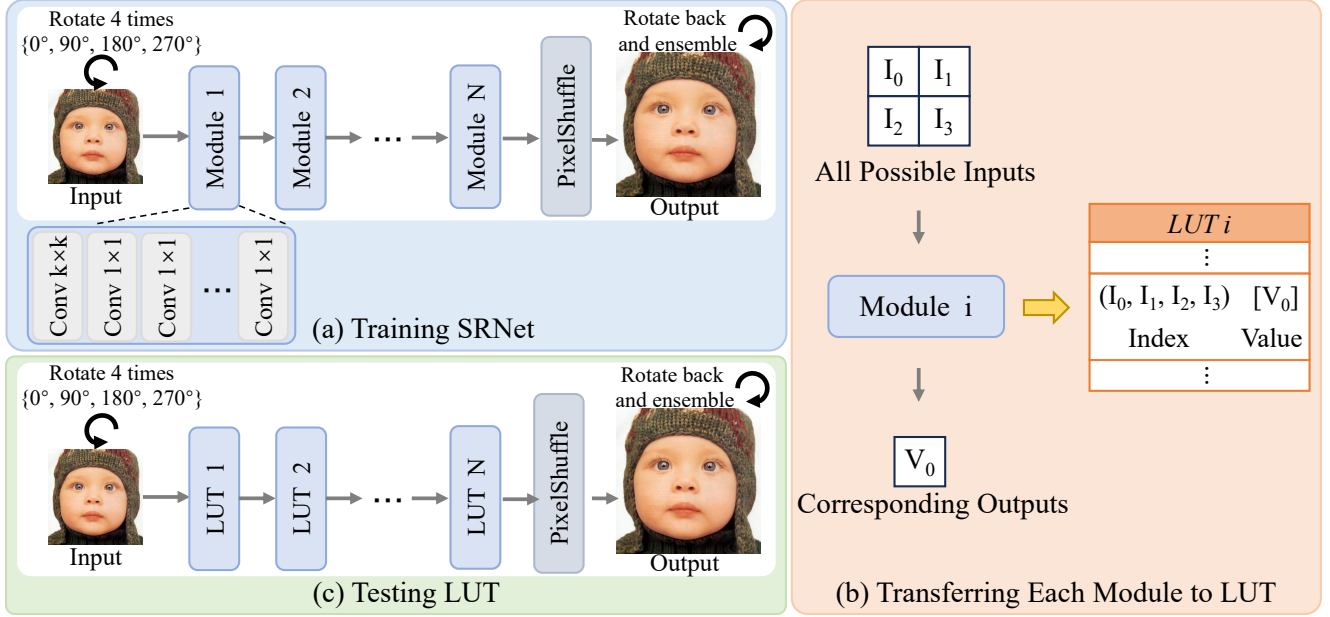

Figure 1. Illustration of training, transferring and testing process for LUT-based methods.

by a simple 1D LUT. This reduces the storage dependency from exponential ( $v^{k^2}$ ) to linear ( $s \times k^2$ ), where  $v$  denotes the number of sampled values. The final output is obtained by averaging the results of all sub-LUTs:

$$\hat{F}^{out} = \frac{1}{k^2} \sum_{i=0}^{n-1} \sum_{j=0}^{n-1} LUT_{(i,j)}[x_{(i,j)}], \quad (7)$$

where  $x_{(i,j)}$  is the input feature and  $LUT_{(i,j)}$  the corresponding 1D LUT.

## S2. Comparison of other shifting operations

In Section 3.2, we introduce LSS with a two-stage training strategy: in the first stage, the offset network predicts floating-point offsets, while in the second stage, the fixed integer-valued offsets are adopted. This quantization process inevitably degrades performance. As shown in Tab. 1, there is a 0.017dB performance drop between the two stages.

A natural question arises: *can LSS directly predict integer-valued offsets to avoid such degradation?* To investigate this, we explore two variants of the LSS module with discrete learnable offsets: the first approach employs Straight-Through Estimation (STE) to round the output offsets from the offset network while maintaining differentiability. The second approach adopts the Gumbel-Softmax method [2], which is commonly used in reinforcement learning to model discrete action states. Experimental results in Tab. 1 show that our two-stage training consistently attains the highest reconstruction accuracy across all

test sets by a large margin, which also validates the effectiveness of the two-stage training strategy proposed in the main paper.

Table 1. Comparison of different shifting operations in ShiftLUT on standard SISR test sets for an upscaling factor of 4.

| Method                    | Set5  | Set14 | BSDS100 | Urban100 |
|---------------------------|-------|-------|---------|----------|
| ShiftLUT (First Stage)    | 31.35 | 28.12 | 27.23   | 25.14    |
| ShiftLUT (Second Stage)   | 31.33 | 28.11 | 27.21   | 25.12    |
| ShiftLUT (STE)            | 30.91 | 27.83 | 27.04   | 24.77    |
| ShiftLUT (Gumbel Softmax) | 31.11 | 27.97 | 27.12   | 24.95    |

## S3. Generalization of the LSS Module

To verify the generalization ability of the proposed LSS module, we integrate LSS into two representative LUT-based networks and report the resulting restoration accuracy for  $\times 4$  SISR in Tab. 2. We choose SPLUT and TinyLUT as the target backbones because both architectures expose multi-channel intermediate features ( $c > 1$ ), which is a necessary condition for LSS.

As shown in Tab. 2, when LSS is appended to SPLUT (feature channels  $c = 4$ ), the effect is marginal: Set5 increases by +0.02 dB (30.01  $\rightarrow$  30.03), Set14 by +0.03 dB, Manga109 by +0.05 dB. By contrast, inserting LSS into TinyLUT (feature channels  $c = 16$ ) yields consistently larger gains across all datasets: Set5 +0.06 dB (31.18  $\rightarrow$  31.24), Set14 +0.03 dB, BSDS100 +0.04 dB, Urban100 +0.13 dB and Manga109 +0.15 dB.

Table 2. Quantitative comparison of PSNR on standard benchmark datasets for x4 super-resolution tasks between the original version of SPLUT and TinyLUT, and the modified version integrating LSS.

|               | <i>Storage Size</i> | <i>Set5</i> | <i>Set14</i> | <i>BSDS100</i> | <i>Urban100</i> | <i>Manga109</i> |
|---------------|---------------------|-------------|--------------|----------------|-----------------|-----------------|
| SPLUT         | 5632KB              | 30.01       | 27.20        | 26.68          | 24.13           | 27.00           |
| SPLUT + LSS   | 5632KB              | 30.03       | 27.23        | 26.65          | 24.13           | 27.05           |
| TinyLUT       | 171KB               | 31.18       | 28.01        | 27.13          | 24.92           | 28.83           |
| TinyLUT + LSS | 171KB               | 31.24       | 28.04        | 27.17          | 25.05           | 28.98           |

Table 3. PSNR-B results of different methods on Classic5 and LIVE1 (quality factor 20, 30, 40).

| PSNR-B | Method                  | Classic5     |              |              | LIVE1        |              |              |
|--------|-------------------------|--------------|--------------|--------------|--------------|--------------|--------------|
|        |                         | 20           | 30           | 40           | 20           | 30           | 40           |
| LUT    | SR-LUT                  | 29.54        | 30.80        | 31.71        | 29.74        | 30.99        | 32.00        |
|        | MuLUT                   | 30.30        | 31.57        | 32.32        | 30.52        | 31.79        | 32.66        |
|        | SPF-LUT+DFC             | 30.65        | 31.95        | 32.75        | 30.80        | 32.10        | 33.02        |
|        | <b>ShiftLUT-F(ours)</b> | <b>31.15</b> | <b>32.33</b> | <b>33.15</b> | <b>31.07</b> | <b>32.31</b> | <b>33.29</b> |
| DNN    | ARCNN                   | 30.59        | 31.98        | 32.79        | 30.79        | 32.38        | 33.14        |
|        | SwinIR                  | 31.99        | 33.03        | 33.66        | 31.70        | 33.01        | 33.88        |

From these observations we draw two conclusions. First, LSS generalizes across different LUT-based architectures: integrating LSS into both SPLUT and TinyLUT produces non-negative or improved reconstruction performance, demonstrating applicability beyond the original backbone. Second, the magnitude of the benefit correlates with the intermediate feature channel dimensionality: networks with more channels (TinyLUT,  $c = 16$ ) obtain larger and more consistent PSNR improvements than networks with fewer channels (SPLUT,  $c = 4$ ). This behaviour is consistent with the design rationale of LSS, which leverages channel-wise spatial diversity into LUTs; hence, LSS is expected to be more effective when richer channel-wise representations are available.

#### S4. Additional Results of Image Restoration

**Image Deblocking.** We report the additional quantitative results for image deblocking under different quality factors (20, 30, and 40) on standard benchmarks in Tab. 3, which compares our method against several state-of-the-art LUT-based and DNN-based methods, including SR-LUT [3], MuLUT [5], SPF-LUT [6], as well as DNN-based approaches such as ARCNN [1], and SwinIR [7].

**Image Denoising.** We report the additional quantitative results for grayscale image denoising at a noise level of 25 and 50 on standard benchmarks in Tab. 4, which compares our method against several state-of-the-art LUT-based and DNN-based methods, including SR-LUT [3], MuLUT [5], SPF-LUT [6], as well as DNN-based approaches such as DnCNN [8], FFDNet [9] and SwinIR [7].

Table 4. PSNR results of different methods on Set12 and BSD68 (noise levels 25, 50).

| PSNR | Method                  | Set12        |              | BSD68        |              |
|------|-------------------------|--------------|--------------|--------------|--------------|
|      |                         | 25           | 50           | 25           | 50           |
| LUT  | SR-LUT                  | 27.19        | 22.62        | 26.85        | 22.39        |
|      | MuLUT                   | 28.94        | 25.46        | 28.18        | 24.97        |
|      | SPF-LUT+DFC             | 29.43        | 26.07        | 28.50        | 25.50        |
|      | <b>ShiftLUT-F(ours)</b> | <b>29.98</b> | <b>26.76</b> | <b>28.90</b> | <b>25.98</b> |
| DNN  | DnCNN                   | 30.44        | 27.18        | 29.23        | 26.23        |
|      | FFDNet                  | 30.54        | 27.32        | 29.19        | 26.29        |
|      | SwinIR                  | 31.01        | 27.97        | 29.50        | 26.58        |

#### S5. Pseudo Code of EAS

Algorithm 1 provides the detailed pseudo-code for the proposed Error-bounded Adaptive Sampling (EAS) pipeline, which encompasses both the offline optimization and online inference stages.

---

**Algorithm 1** EAS Pipeline: Optimization & Inference

---

```
1: Stage 1: Offline Optimization
2: Input: Pre-trained LUTs  $\{\mathcal{L}_1, \dots, \mathcal{L}_L\}$ , tolerance  $\varepsilon$ 
3: for each layer  $l = 1 \dots L$  do
4:   Search for max stride  $s_l^* \in \mathcal{S}$  s.t.  $\text{Error}(s_l^*) \leq \varepsilon$ 
5:   Store compressed  $\mathcal{L}_l^{sparse}$ 
6: end for

7: Stage 2: Online Inference (Serial Cascade)
8: Input: Image  $x$ , Compressed  $\{\mathcal{L}_1^{sparse}, \dots\}$ , Shared Buffer  $\mathcal{B}$ 
9: for each layer  $l = 1 \dots L$  do  $\triangleright$  Process layers sequentially
10:  // Step A: Refresh Buffer with current layer's LUT
11:  for  $i \in 0 \dots 2^{\text{MSB}} - 1$  do
12:     $\mathcal{B}[i] \leftarrow \text{Query}(\mathcal{L}_l^{sparse}, i, s_l^*)$   $\triangleright$  Pre-compute
13:  end for
14:  // Step B: Pixel-wise Inference (Zero-overhead lookup)
15:  for each pixel  $p$  in  $x$  do
16:     $x_p \leftarrow x_p + \mathcal{B}[x_p]$   $\triangleright$  Residual lookup using buffer
17:  end for
18: end for
19: return Processed feature map  $x$ 
```

---

- [9] Kai Zhang, Wangmeng Zuo, and Lei Zhang. Ffdnet: Toward a fast and flexible solution for cnn-based image denoising. *IEEE Transactions on Image Processing*, 27(9):4608–4622, 2018. 3

## References

- [1] Chao Dong, Yubin Deng, Chen Change Loy, and Xiaoou Tang. Compression artifacts reduction by a deep convolutional network. In *Proceedings of the IEEE international conference on computer vision*, pages 576–584, 2015. 3
- [2] Eric Jang, Shixiang Gu, and Ben Poole. Categorical reparameterization with gumbel-softmax. *arXiv preprint arXiv:1611.01144*, 2016. 2
- [3] Younghyun Jo and Seon Joo Kim. Practical single-image super-resolution using look-up table. In *Proceedings of the IEEE/CVF Conference on Computer Vision and Pattern Recognition*, pages 691–700, 2021. 3
- [4] Huanan Li, Juntao Guan, Lai Rui, Sijun Ma, and Lin Gu. Tynylut: Tiny look-up table for efficient image restoration at the edge. *Advances in Neural Information Processing Systems*, 37:85340–85359, 2024. 1
- [5] Jiacheng Li, Chang Chen, Zhen Cheng, and Zhiwei Xiong. Mulut: Cooperating multiple look-up tables for efficient image super-resolution. In *European conference on computer vision*, pages 238–256. Springer, 2022. 3
- [6] Yinglong Li, Jiacheng Li, and Zhiwei Xiong. Look-up table compression for efficient image restoration. In *Proceedings of the IEEE/CVF Conference on Computer Vision and Pattern Recognition*, pages 26016–26025, 2024. 3
- [7] Jingyun Liang, Jiezhong Cao, Guolei Sun, Kai Zhang, Luc Van Gool, and Radu Timofte. Swinir: Image restoration using swin transformer. In *Proceedings of the IEEE/CVF international conference on computer vision*, pages 1833–1844, 2021. 3
- [8] Kai Zhang, Wangmeng Zuo, Yunjin Chen, Deyu Meng, and Lei Zhang. Beyond a gaussian denoiser: Residual learning of deep cnn for image denoising. *IEEE transactions on image processing*, 26(7):3142–3155, 2017. 3
